# Supplementary material for: Synthesis, structure elucidation and DFT studies of a new coumarin-derived Zn(ii) complex: in vitro DNA/HSA binding profile and pBR322 cleavage pathway
Source: Royal Society of Chemistry journal article supplement (doi:10.1039/c4ra05637j), 2014-01-01
Supplement: c4ra05637j1.pdf [file c4ra05637j1.pdf]

## Supporting Information

### **Synthesis, structure elucidation and DFT studies of a new coumarin derived Zn(II) complex: *In vitro* DNA/HSA binding profile and pBR322 cleavage pathway**

Ruchi Singh<sup>a</sup>, Mohd. Afzal<sup>b</sup>, Mehvash Zaki<sup>b</sup>, Musheer Ahmad<sup>a</sup>, and Sartaj Tabassum<sup>b\*</sup>

<sup>a</sup>*Department of Chemistry, Indian Institute of Technology Kanpur, UP–208016, India*

<sup>b</sup>*Department of Chemistry, Aligarh Muslim University, Aligarh, UP–202002, India.*

*\* Corresponding author:*

*Aligarh Muslim University, Aligarh, UP–202002, India.*

*Tel.: +91 9358255791*

*E-mail address: tsartaj62@yahoo.com (S. Tabassum)*

**Table S1.** Selected Geometrical Parameters Bond Length (Å) and Bond Angles (°) in **1**.

| Geometrical Parameters | Experimental from X-ray data | Theoretical calculations |
|------------------------|------------------------------|--------------------------|
| Zn1–O1                 | 2.064(4)                     | 2.0641                   |
| Zn1–O9                 | 2.101(4)                     | 2.1011                   |
| Zn1–O2W                | 2.075(5)                     | 2.0752                   |
| Zn1–O2W                | 2.121(4)                     | 2.1202                   |
| Zn1–O3W                | 2.087(5)                     | 2.0874                   |
| Zn1–O4W                | 2.098(4)                     | 2.0981                   |

**Table S2.** Selected Bond Distances (Å) and Bond Angles (°) in **1**.**1**

Zn1 O1 2.064(4)

Zn1 O9 2.101(4)

Zn1 O1W 2.075(5)

Zn1 O2W 2.121(4)

Zn1 O3W 2.087(5)

Zn1 O4W 2.098(4)

O1 Zn1 O1W 97.73(17)

O1 Zn1 O3W 85.88(17)

O1W Zn1 O3W 176.36(19)

O1 Zn1 O4W 89.05(16)

O1W Zn1 O4W 85.99(18)

O3W Zn1 O4W 93.58(18)

O1 Zn1 O9 174.35(17)

O1W Zn1 O9 87.92(17)

O3W Zn1 O9 88.47(16)

O4W Zn1 O9 91.16(16)

O1 Zn1 O2W 94.68(17)

O1W Zn1 O2W 83.48(17)

O3W Zn1 O2W 96.78(18)

O4W Zn1 O2W 169.21(19)

O9 Zn1 O2W 86.12(16)

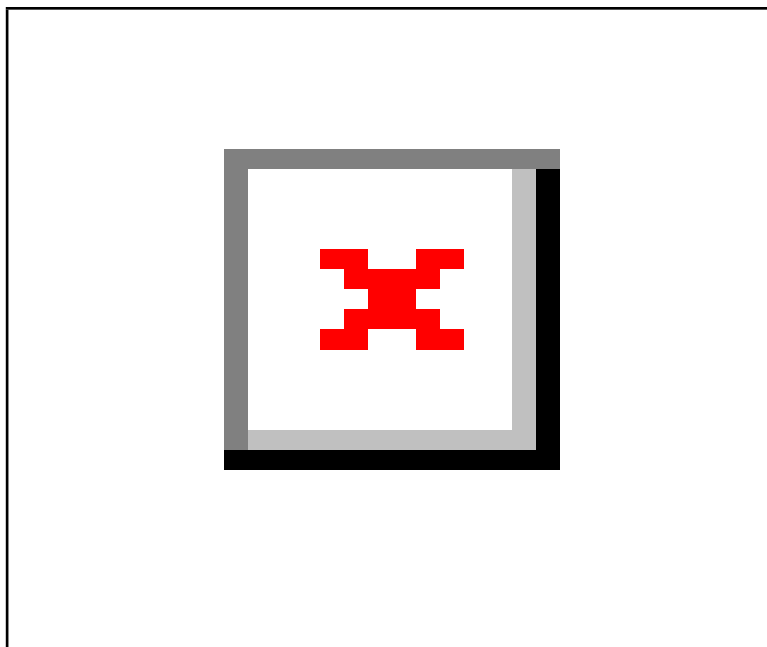

**Fig. S1.** Thermogravimetric analysis of Complex 1.

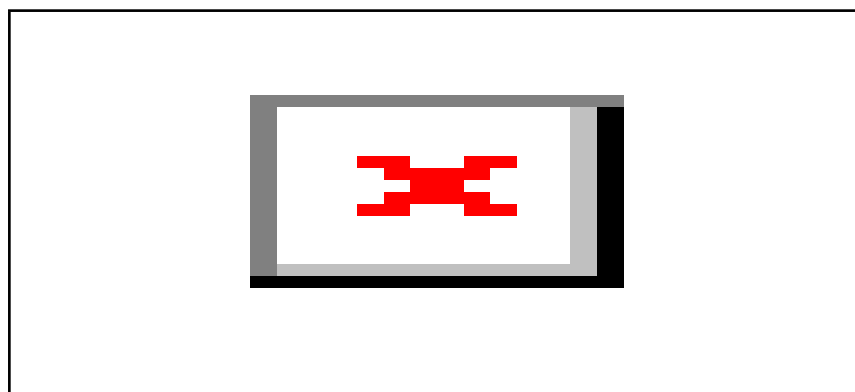

**Fig. S2.** PXRD of Complex 1.

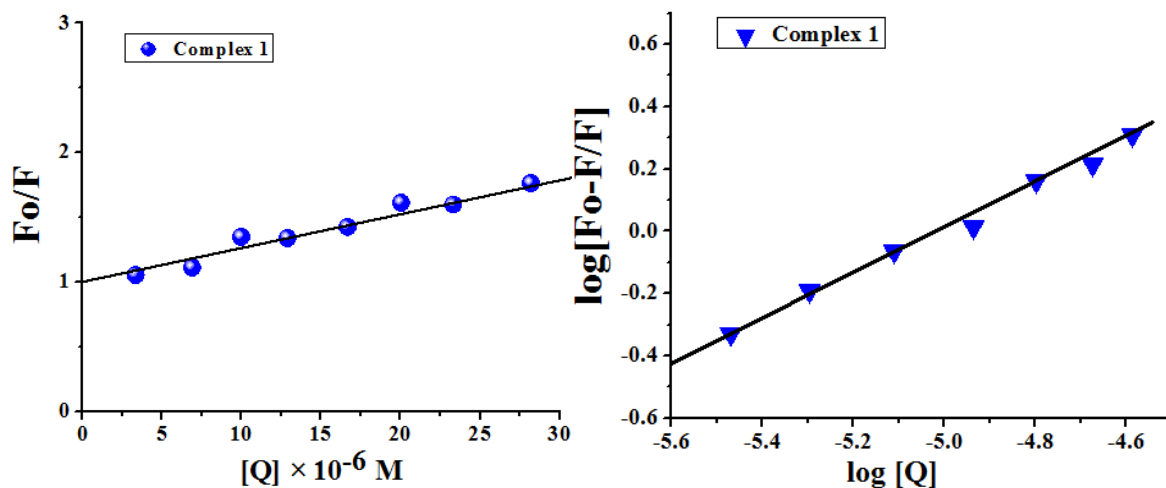

**Fig. S3.** (a) Stern–Volmer plots showing HSA tryptophan quenching caused by complex **1** at room temperature (pH 7.40,  $\lambda_{\text{ex}} = 295 \text{ nm}$ ,  $\lambda_{\text{em}} = 327 \text{ nm}$ ); (b) Logarithmic plot of the fluorescence quenching of HSA for the calculation of binding constant (K) and number of binding sites (n) for complex **1** HSA at room temperature.

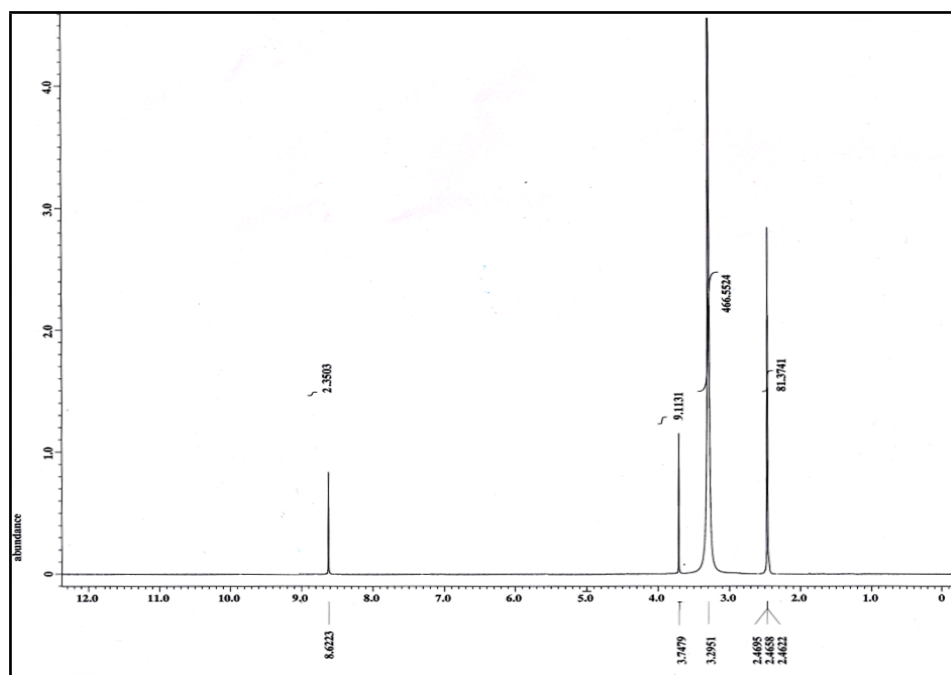

**Fig. S4.**  $^1\text{H}$ NMR spectrum of Triester.

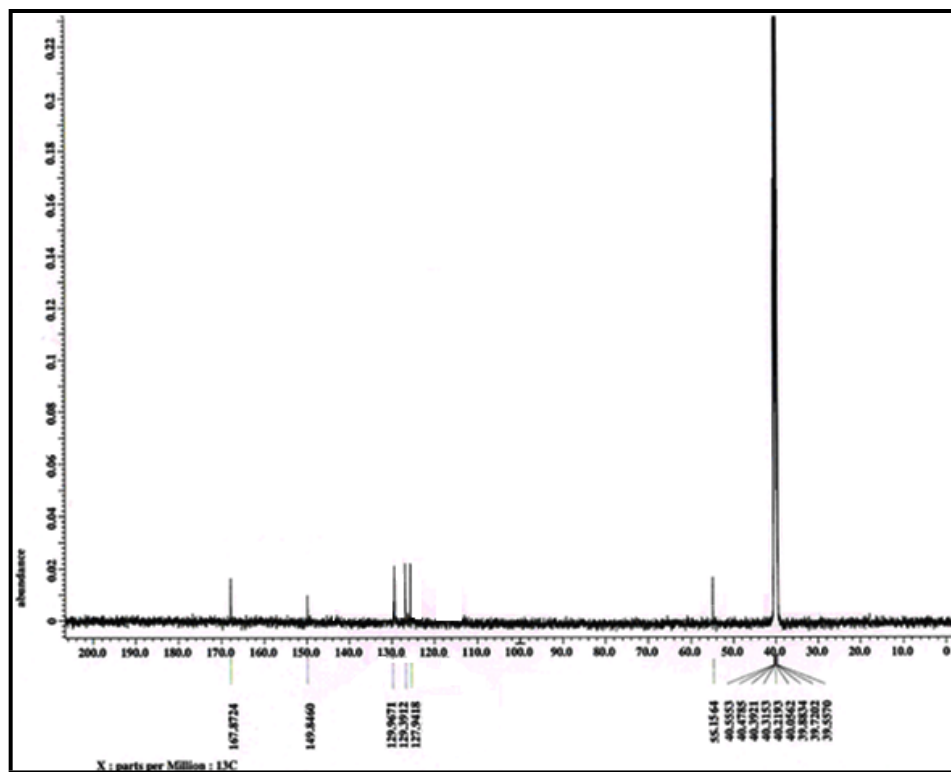

Fig. S5.  $^{13}\text{C}$  NMR spectrum of Triester.

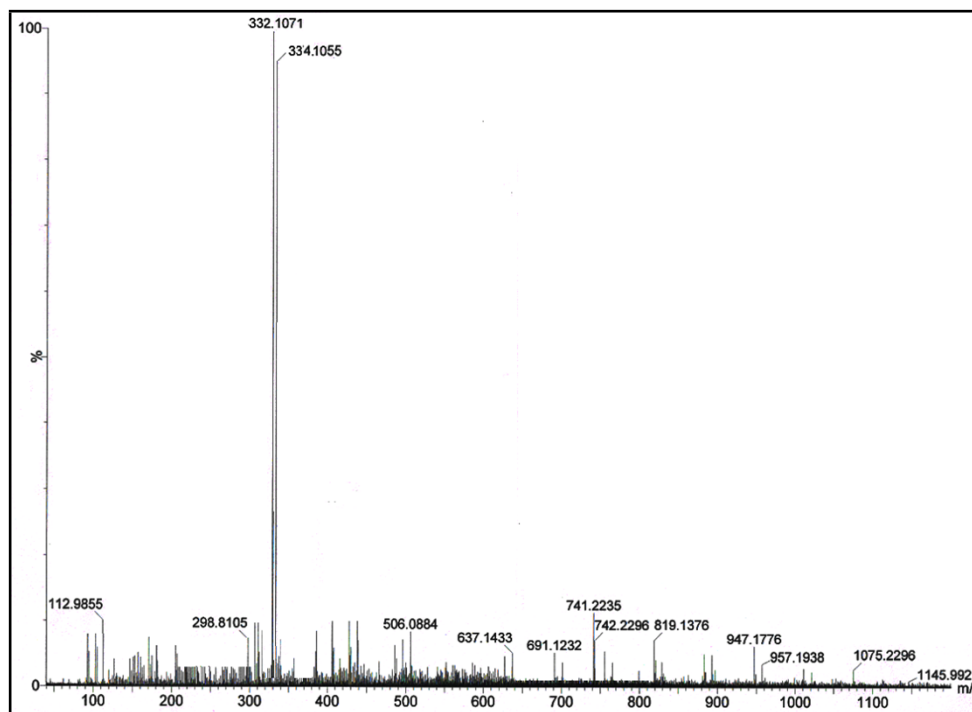

Fig. S6. ESI-MS spectrum of Triester.

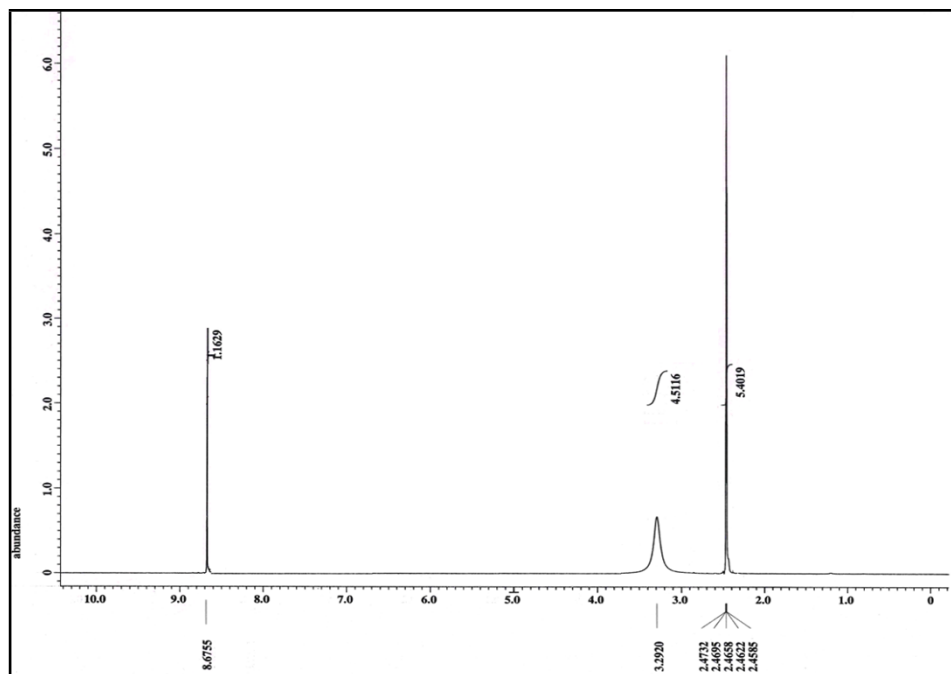

**Fig. S7.** <sup>1</sup>H NMR spectrum of H<sub>6</sub>L.

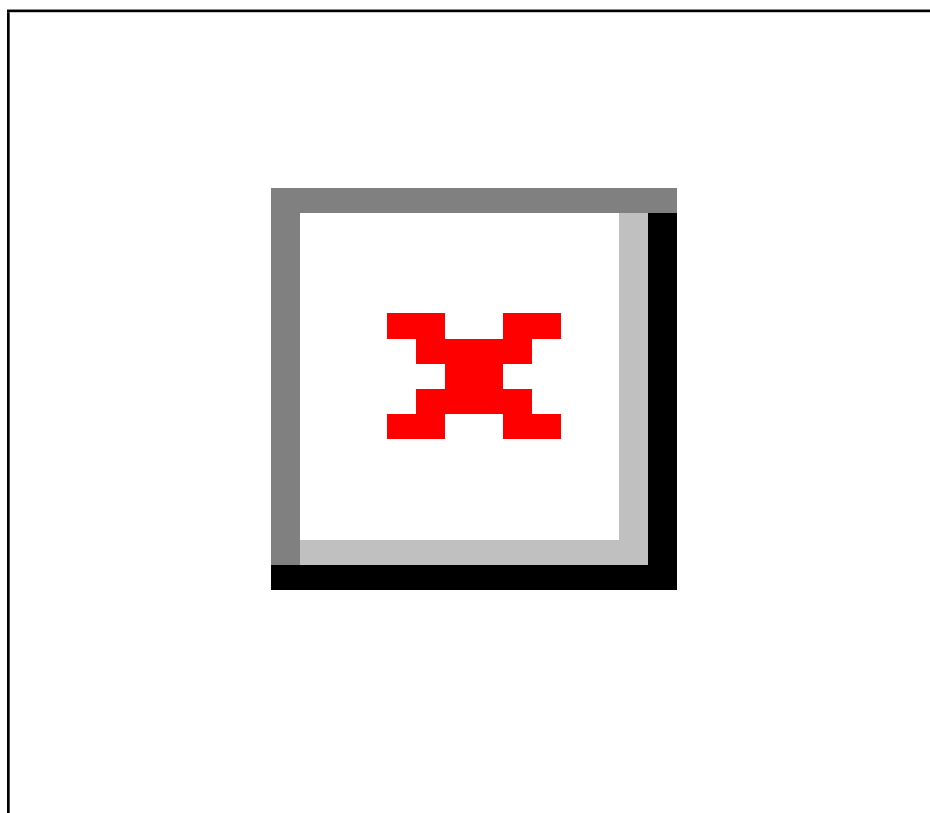

**Fig. S8.** <sup>13</sup>C NMR spectrum of H<sub>6</sub>L.

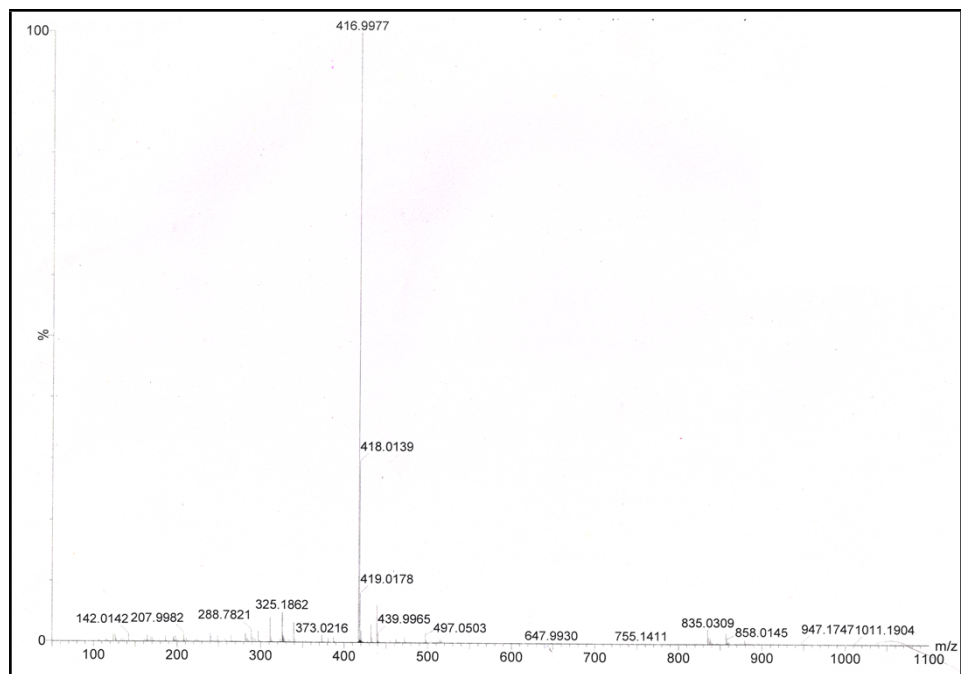

**Fig. S9.** ESI-MS spectrum of H<sub>6</sub>L.

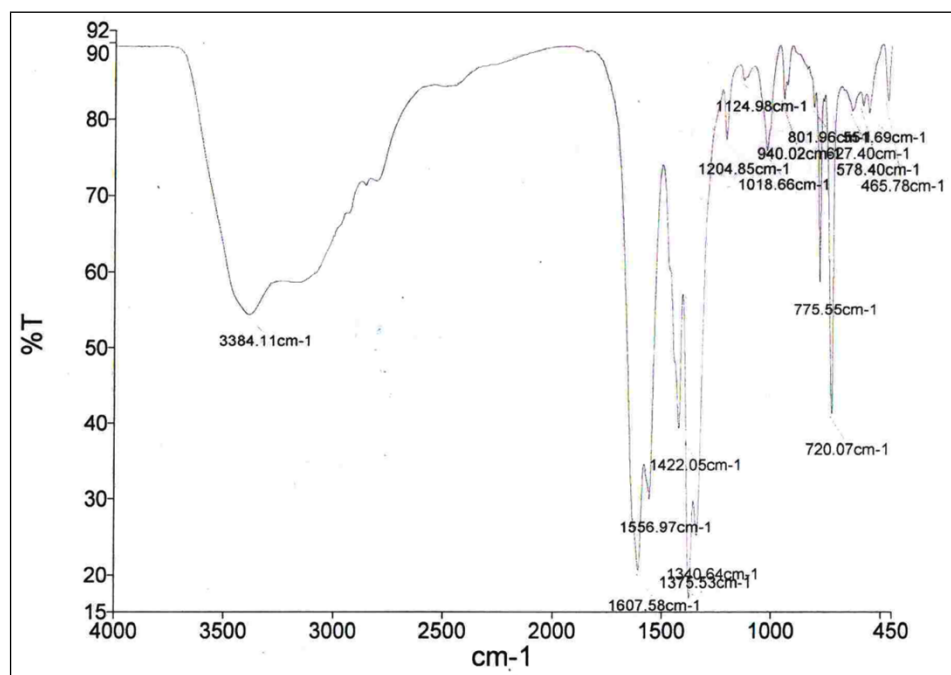

**Fig. S10.** IR spectrum of Complex 1.

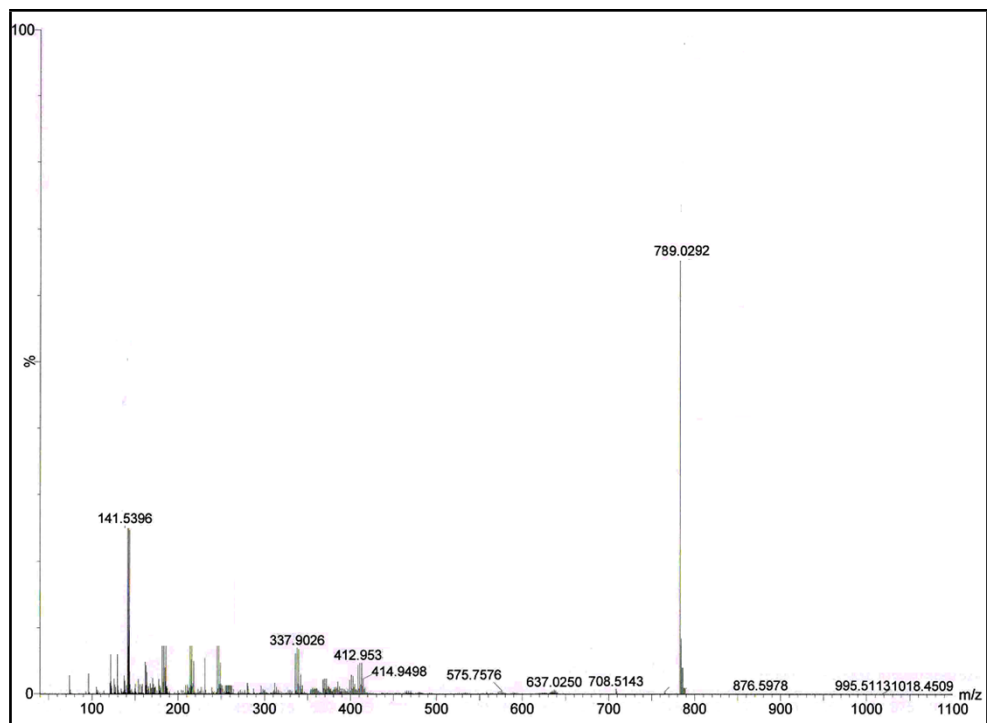

**Fig. S11.** ESI-MS of Complex 1.
